# Supplementary material
Source: PubMed Central journal article supplement (PMC7807731)
Supplement: 13073_2020_823_MOESM2_ESM.pdf [file 13073_2020_823_MOESM2_ESM.pdf]

# Fig. S1

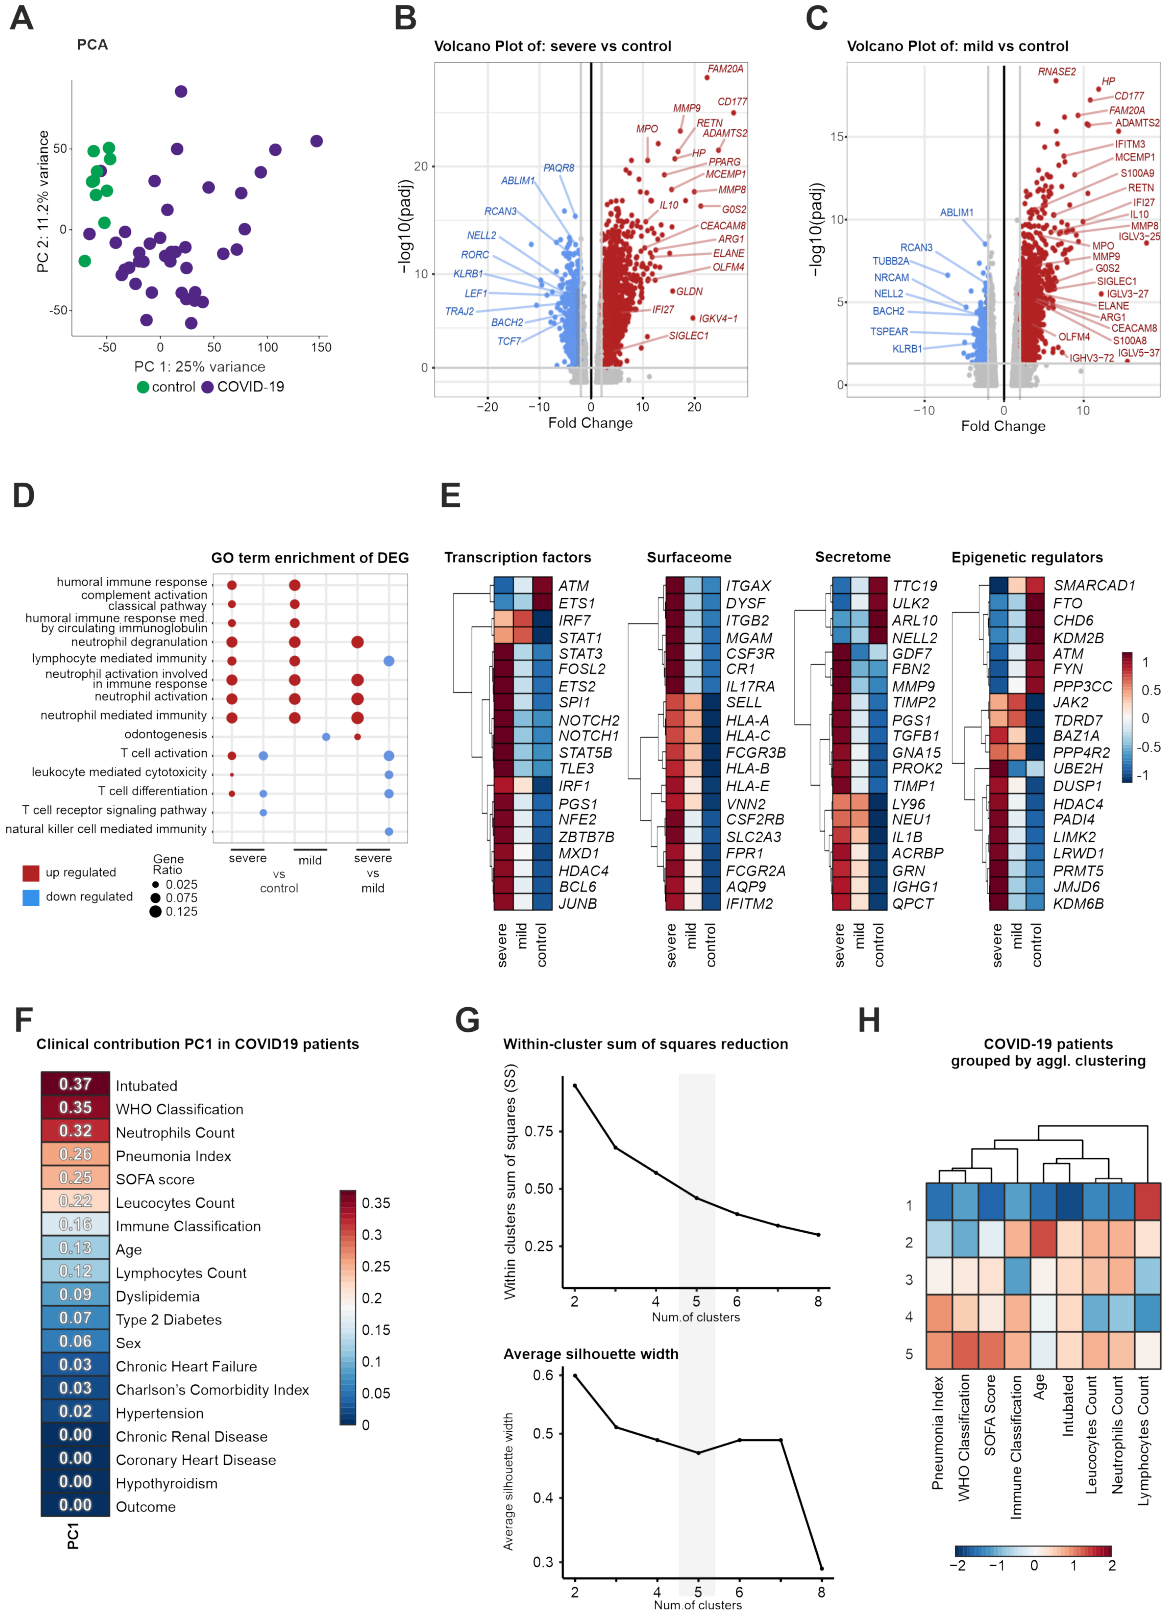

*Figure S1 – related to Figure 1*

**(A)** PCA plot depicting relationship of all samples based on dynamic gene expression of all genes comparing COVID-19 and control samples.

**(B-C)** Volcano plots depicting fold changes and FDR-adjusted p-values comparing severe **(A)** or mild **(B)** COVID-19 patients vs. controls. Differentially expressed up- (red) and downregulated genes (blue) are shown and selected genes are highlighted.

**(D)** Plot of top 10 most enriched GO terms for significantly up- and downregulated genes. Ratios of significantly regulated genes within enriched GO terms (GeneRatio) are shown for the comparisons between mild or severe COVID-19 patients and controls as well as between 'mild' and 'severe' COVID-19 patients.

**(E)** Heat map of group mean gene expression values from the top 20 most variant transcription factors, epigenetic regulators, surface and secreted proteins.

**(F)** Heat map of the linear model adjusted r-square that includes each clinical parameter with PC1. Clinical parameters with r-adjusted square  $\geq 0.1$  were used for agglomerative clustering of COVID-19 patients.

**(G)** Plots for agglomerative clustering statistics: within cluster sum of squares and high average silhouette width scores.

**(H)** Heat map presenting summary statistics of the clinical parameters used for the clustering across clinical agglomerative clusters 1-5.

Fig. S2

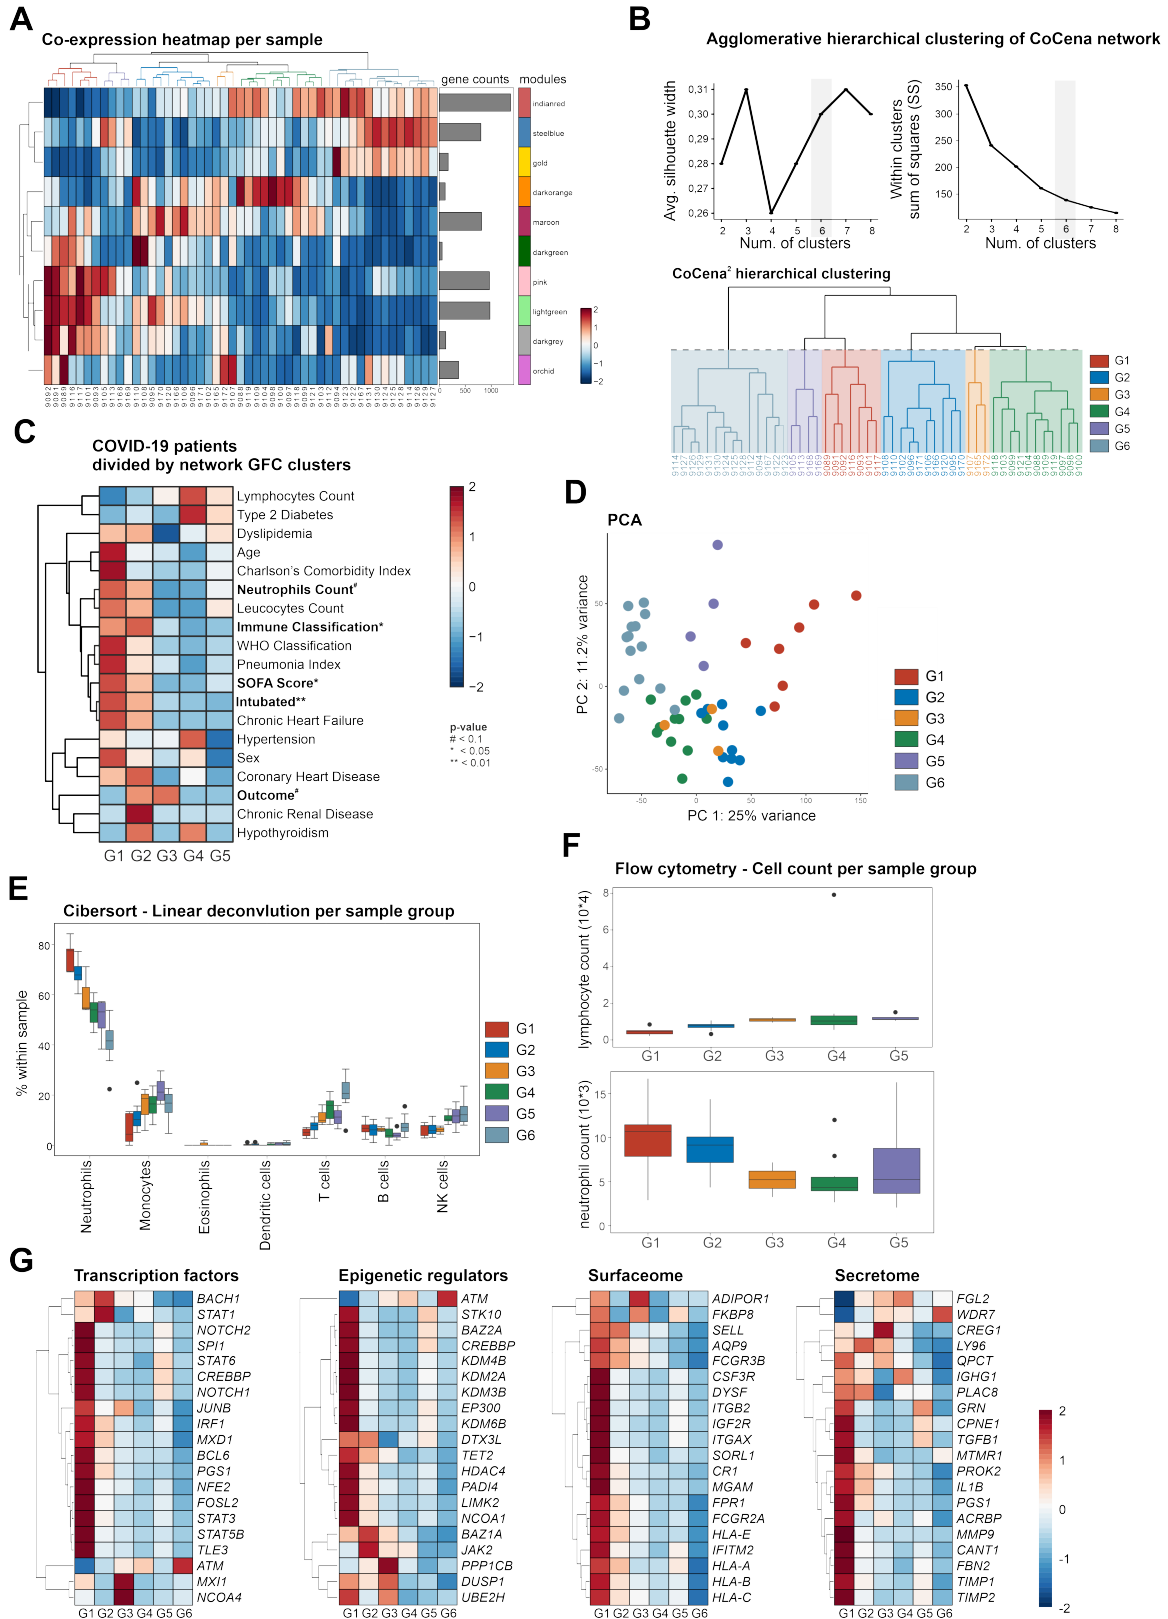

*Figure S2 – related to Figure 2*

**(A)** Group fold change (GFC) heat map and hierarchical clustering for each sample and the gene modules identified by CoCena<sup>2</sup> analysis.

**(B)** Agglomerative hierarchical clustering of the samples according to the GFC. Top plots present the clustering statistics (within cluster sum of squares and high average silhouette width scores) used for the generation of the six data-driven CoCena<sup>2</sup> sample groups G1-G6, which are plotted in the dendrogram plot.

**(C)** Heat map presenting summary statistics of clinical parameters for COVID-19 patients grouped according to the CoCena<sup>2</sup> sample groups G1-G5. Presented are scaled values of the mean value of the parameters age/blood cell counts/SOFA score/Pneumonia Index/Charlson score, and prevalence of the comorbidity/death (outcome)/male (sex)/immune classification (intermediate/dysregulation/MAS). Statistical differences were estimated among the groups via the one-sided Anova test or Fisher test, for numeric or categorical values respectively. (\*, \*\* p-value < 0.05, 0.01 respectively)

**(D)** PCA plot depicting relationship of all samples based on dynamic gene expression of all genes. Coloring based on the six data-driven CoCena<sup>2</sup> sample groups G1-G6.

**(E)** Cibersort cell type deconvolution at cell subset level. Grouping based on the six data-driven CoCena<sup>2</sup> sample groups G1-G6.

**(F)** Flow cytometry analysis, number of lymphocytes (upper) and neutrophils (lower) per  $\mu\text{l}$  of blood. Grouping based on the six data-driven CoCena<sup>2</sup> sample groups G1-G6.

**(G)** Heat map of DE and top 20 most variable transcription factors, epigenetic regulators, surface and & secreted proteins.



Fig. S3

A

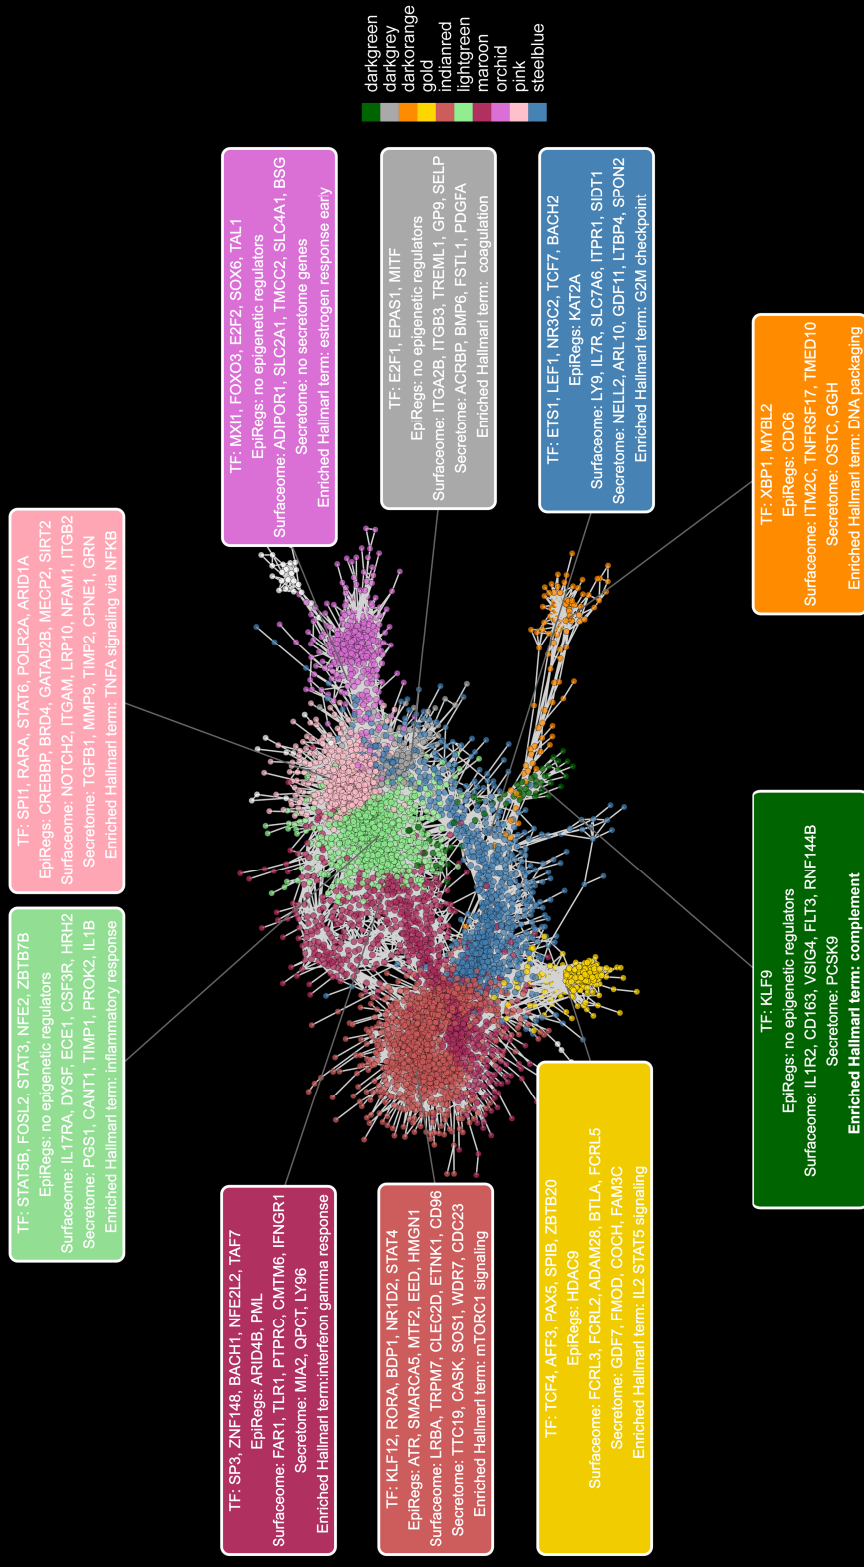

*Figure S3 – related to Figure 2*

**(A)** Visualization of the COVID-19 CoCena<sup>2</sup> network. Nodes are genes and edges represent co-expressed genes. Additional module information is displayed by module-colored labels. Labels include information about top-connected transcription factors (TFs), epigenetic regulators, surface & secreted markers as well as representative Hallmark terms.

# Fig. S4

**A**

Co-expression heatmap per sample based on modules Fig 2C

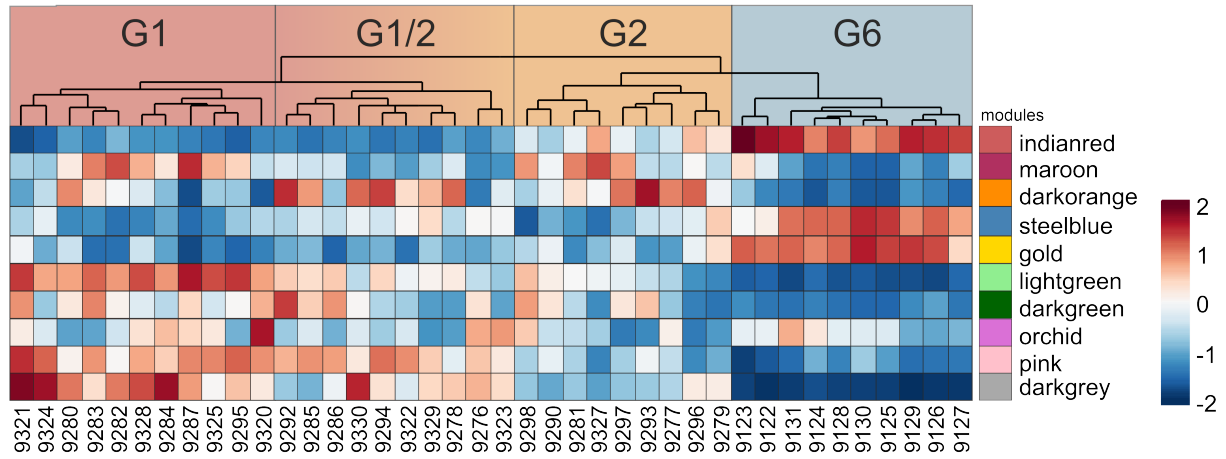

**B**

Agglomerative hierarchical clustering of CoCena<sup>2</sup> network

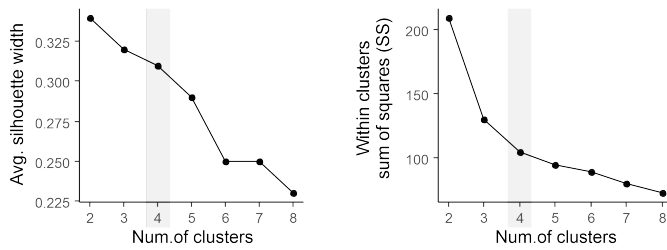

**C**

Co-expression heatmap per group based on modules Fig 2C

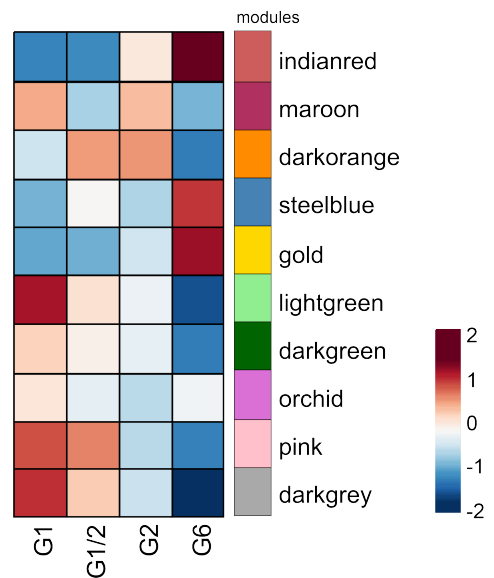

*Figure S4 – related to Figure 2*

**(A)** Heat map of mean group fold changes (GFCs) of the CoCena<sup>2</sup> whole blood modules in the second COVID-19 cohort for each sample. Patients are clusters by the mean GFC module expression. Severity patterns found in the whole blood CoCena<sup>2</sup> network were identified and patients groups were labeled accordingly (G1-G6).

**(B)** Agglomerative hierarchical clustering of the samples according to the GFC. Top plots present the clustering statistics (within cluster sum of squares and high average silhouette width scores) used for the generation of the six data-driven CoCena<sup>2</sup> sample groups G1-G6, which are plotted in the dendrogram plot.

**(C)** GFC heat map and hierarchical clustering for the four identified sample groups and the gene modules identified with CoCena<sup>2</sup> analysis.

# Fig. S5

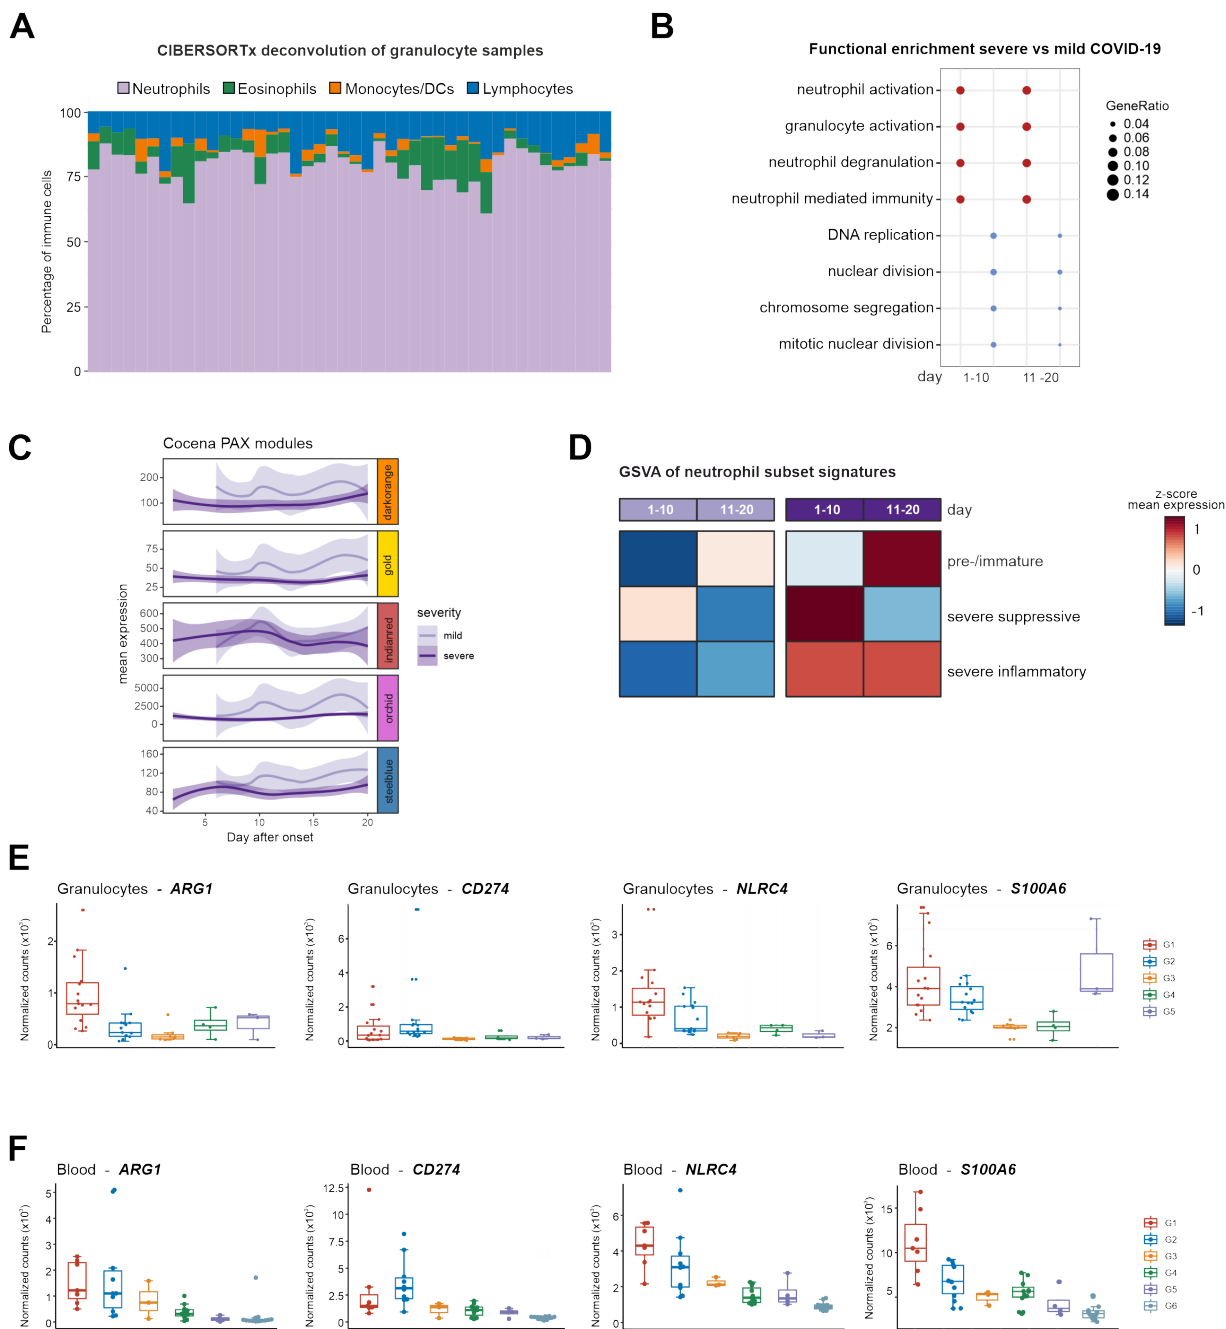

*Figure S5 – related to Figure 3*

**(A)** Cibersort computational deconvolution of the 44 granulocyte samples used in Figure 3. The LM22 reference signature was used.

**(B)** Functional enrichment analysis of the DEGs between severe and mild COVID-19 patients by GOEA.

**(C)** Mean of group fold changes (GFCs) of the modules darkorange, gold, indianred, orchid and steelblue in the granulocyte samples of mild (light purple) and severe (purple) COVID-19 cases over time.

**(D)** GSVA of single-cell neutrophil signatures (34). Samples are ordered by COVID-19 severity status and days after disease onset.

**(E)** Box plots of *ARG1*, *CD274*, *NLRC4* and *S100A8* in granulocytes grouped by G1-G5.

**(F)** Box plot of *ARG1*, *CD274*, *NLRC4* and *S100A8* in whole blood grouped by G1-G6.

Fig. S6

A

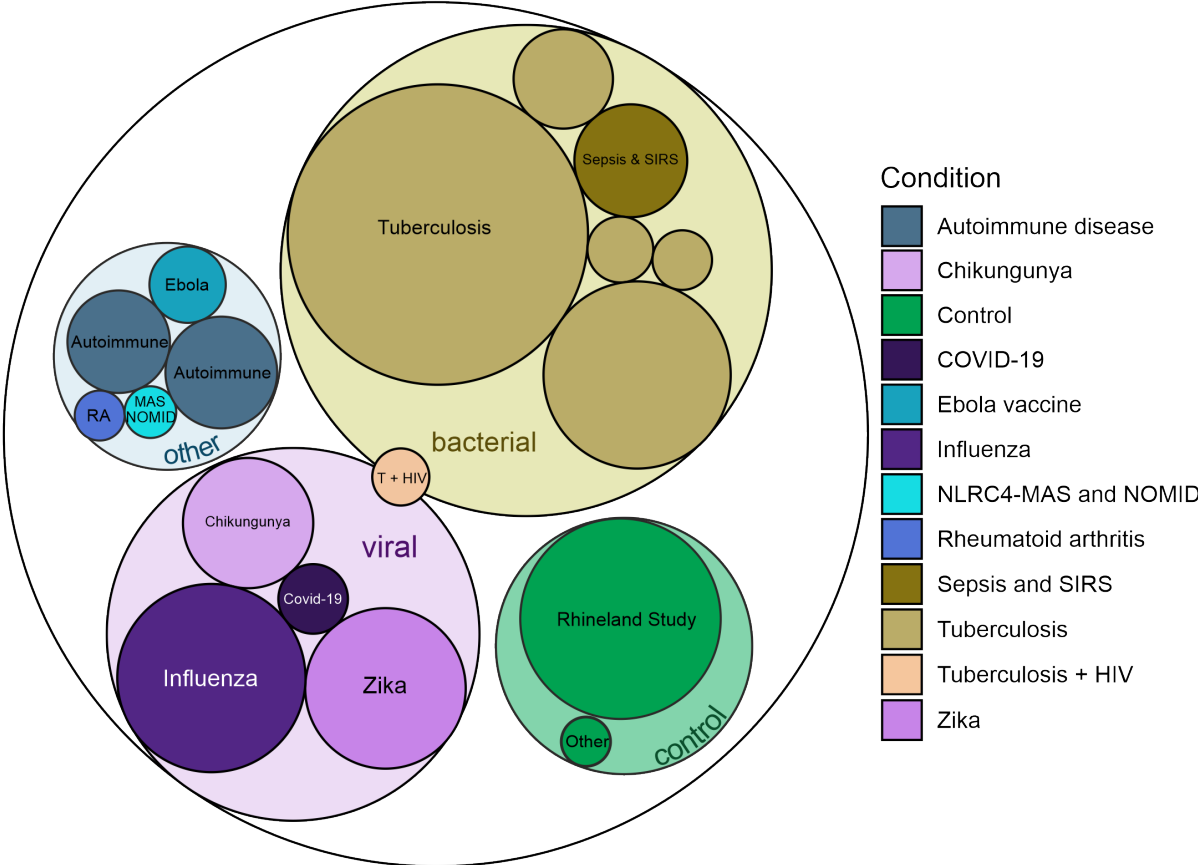

*Figure S6 – related to Figure 4*

**(A)** Overview of the composition of the integrated dataset comprising 3,176 samples: 39 COVID-19 samples and 3,137 other conditions and controls.





*Figure S7 – related to Figure 5*

**(A)** Word cloud of the target genes of drugs currently investigated for the treatment of COVID-19 patients. Increasing frequency is represented by increasing size with min. frequency = 41 and max. frequency = 97.

**(B)** Overview of drugs currently used, investigated or recommended for the treatment of COVID-19 patients. The inner circle represents the number of drugs for the representative drug categories, the outer circle represents the number of clinical trials of drugs for the respective drug categories.

**(C)** Differentially expressed genes ( $FC > |2|$ , FDR-adj. p-value  $< 0.05$ ) of comparisons between groups G1-5 vs G6. Vertical bar plots indicate the number of group-specific differentially expressed genes (DEGs, right) and genes shared by several groups (left), whereby the contributing groups are indicated as connected dots (bottom). Horizontal bar plots visualize the size of DEGs per group.

**(D)** Gene ontology enrichment analysis of upregulated DEGs obtained for each comparison G1-G5 vs G6. Visualized are significant enrichments (adj. p-value  $< 0.05$ , q-value  $< 0.05$ ) for the union of top 10 terms per comparison. Term ratio indicates the ratio of DEGs matching the term and the total gene number of that term.

**(E)** Box plots of normalized expression of selected DEGs, upregulated in at least one comparison.

**(F)** Display of selected drug signatures from k-means cluster 13 from Fig. 5C showing high  $\Delta$ NES scores throughout all patient groups compared to G6.

**(G)** Visualization of recurring target genes in the G1 vs G6 comparison of cluster 13 signatures and their frequency mapped onto the CoCena<sup>2</sup> network

Fig. S8

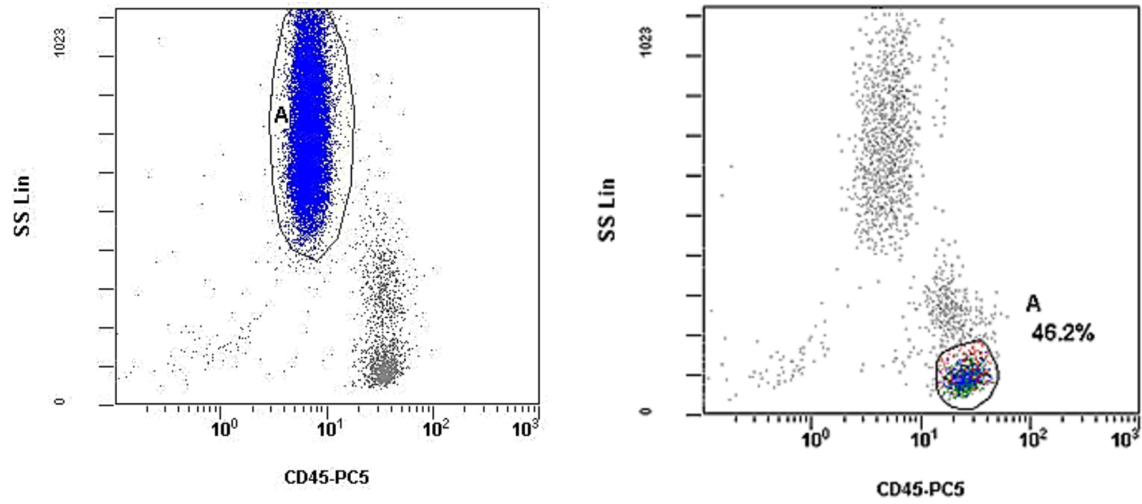

Figure S8 – related to methods gating

**(A)** Gating to identify neutrophils and lymphocytes using the characteristic sideward scattering of CD45-positive cells.
